# Supplementary material
Source: Springer Nature journal article supplement (https://www.springermedizin.de/resource/supplementary/12903_2014_387_MOESM1_ESM.pdf/9516924)
Supplement: MOESM1 [file 9516924]

Screened  
(n=1203)

Included into the study  
(n=317, N=744)

Included into the two sealant groups  
(n=280, N=383)

**Random Allocation**

Allocated to Gp1 (n=157, N=189)

- ◆ Received resin sealant (n=157, N=189)
- ◆ Did not receive (n=0)

Distribution based on group combination during random allocation in the study:  
Sealant/sealant (n=40, N=47)  
Sealant/SDF (n=62, N=77)  
Sealant/sealant (n=55, N=65)

Allocated to Gp2 (n=160, N=194)

- ◆ Received ART sealant (n=160, N=194)
- ◆ Did not receive (n=0)

Distribution based on group combination during random allocation in the study:  
Sealant/sealant (n=40, N=45)  
Sealant/SDF (n=61, N=73)  
Sealant/sealant (n=59, N=76)

**Follow-Up**

Lost to follow-up (n=9, N=11)

Reason: the 9 children were absent on the day of examination.

Distribution based on group combination during random allocation in the study:  
Sealant/sealant (n=2, N=2)  
Sealant/SDF (n=3, N=4)  
Sealant/sealant (n=4, N=5)

Lost to follow-up (n=12, N=15)

Reason: the 12 children were absent on the day of examination.

Distribution based on group combination during random allocation in the study:  
Sealant/sealant (n=2, N=2)  
Sealant/SDF (n=5, N=6)  
Sealant/sealant (n=5, N=7)

**Analysis**

**Analysed**

Survival analysis (n=157, N=189)  
GEE modeling (n=148, N=178)

**Analysed**

Survival analysis (n=160, N=194)  
GEE modeling (n=148, N=179)
